# Supplementary material for: Pattern Genes Suggest Functional Connectivity of Organs
Source: PubMed Central journal article supplement (PMC4880915; doi:10.1038/srep26501), 2016-05-26
Supplement: srep26501-s1.pdf [file srep26501-s1.pdf]

## SUPPLEMENTARY INFORMATION

### **Pattern Genes Suggest Functional Connectivity of Organs.**

Yangmei Qin<sup>1,+</sup>, Jianbo Pan<sup>2,+</sup>, Meichun Cai<sup>1</sup>, Lixia Yao<sup>3</sup>, Zhiliang Ji<sup>1,2,\*</sup>

<sup>1</sup> State Key Laboratory of Cellular Stress Biology, School of Life Sciences, Xiamen University, Xiamen, Fujian, 361102, P R China

<sup>2</sup> Department of Chemical Biology, College of Chemistry and Chemical Engineering, The Key Laboratory for Chemical Biology of Fujian Province, Xiamen University, Xiamen, Fujian, 361005, P R China

<sup>3</sup> Department of Software and Information Systems, University of North Carolina at Charlotte, North Carolina, 28105, USA

\*These authors have equal contribution

\*To whom it may correspond to:

Zhiliang Ji,

Tel: 86-0592-2182897;

Fax: 86-0592-2182897;

Email: [appo@xmu.edu.cn](mailto:appo@xmu.edu.cn)

## Supplementary Method

Pattern genes are identified from eight human transcriptome datasets using “SPM” method, which also described in our previous work[1]. “SPM” method includes three statistical parameters: SPM, DPM and CTM. They are described briefly below:

First, each gene expression profile is transformed into a vector  $X$ :

$$X = (x_1, x_2, \dots, x_i, \dots, x_{n-1}, x_n) \quad [n \text{ is the number of samples in the profile}]$$

Similarly, a vector  $X_i$  can be generated to represent the gene expression in sample (condition)  $i$ :

$$X_i = (0, 0, \dots, x_i, \dots, 0, 0)$$

### SPM : Specificity Measure

SPM is the cosine value of the intersection angle  $\theta$  between vectors  $X_i$  and  $X$  in high dimensional feature space, which measures the specificity of a gene's expression in a designated sample.

$$SPM = \cos \theta = \frac{X_i \cdot X}{|X_i| \cdot |X|}$$

So a gene expression profile ( $X$ ) can be converted to a corresponding SPM profile ( $X_{SPM}$ ):

$$X_{SPM} = (SPM_1, SPM_2, \dots, SPM_i, \dots, SPM_{n-1}, SPM_n)$$

### DPM : Dispersion Measure

DPM is the standard deviation in unitary form based on the transformed SPM profile:

$$DPM = \sqrt{\frac{\sum_{i=1}^n (SPM_i - \overline{SPM})^2}{n-1}} \cdot \sqrt{n} \quad [\overline{SPM} \text{ is the mean value of } SPMs \text{ in a gene expression profile}]$$

### CTM : Contribution Measure

CTM measures the enrichment of gene expression levels in several samples:

$$CTM_k = \sqrt{\sum_{i=1}^k SPM_i^2} \quad [k \text{ is the number of selected samples, } 2 \leq k \leq 6]$$

Pattern genes can be defined and evaluated using the three statistical parameters defined above (SPM, DPM, and CTM) alone or in combination:

Housekeeping gene : DPM < 0.3

Selective gene :  $2 \leq k \leq 6$ ,  $SPM_{i(1 \text{ to } k)} > 0.3$ , and  $CTM_k > 0.9$

Specific gene : SPM > 0.9

## References

1. Pan, J. B. et al. PaGenBase: a pattern gene database for the global and dynamic understanding of gene function. PloS one 8, e80747, doi:10.1371/journal.pone.0080747 (2013).

## Supplementary Figure S1. Gene ontology enrichment of pattern genes.

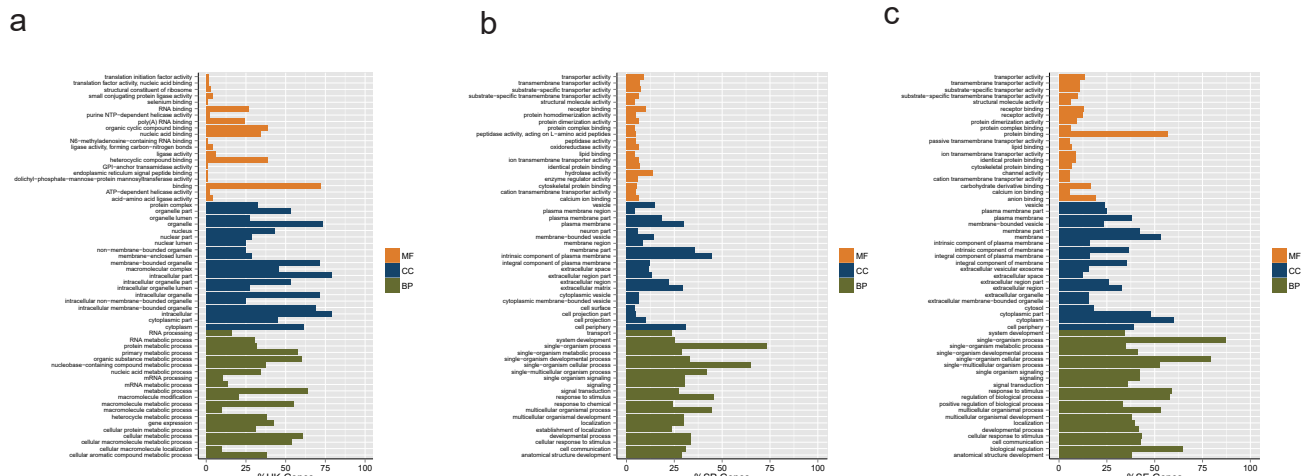

## Supplementary Figure S1. Gene ontology enrichment of pattern genes.

(a) Housekeeping genes (HK). (b) Specific genes (SP). (c) Selective genes (SE). The Go Term were sorted in alphabetical order.

## Supplementary Figure S2. Organ clustering on six selective datasets.

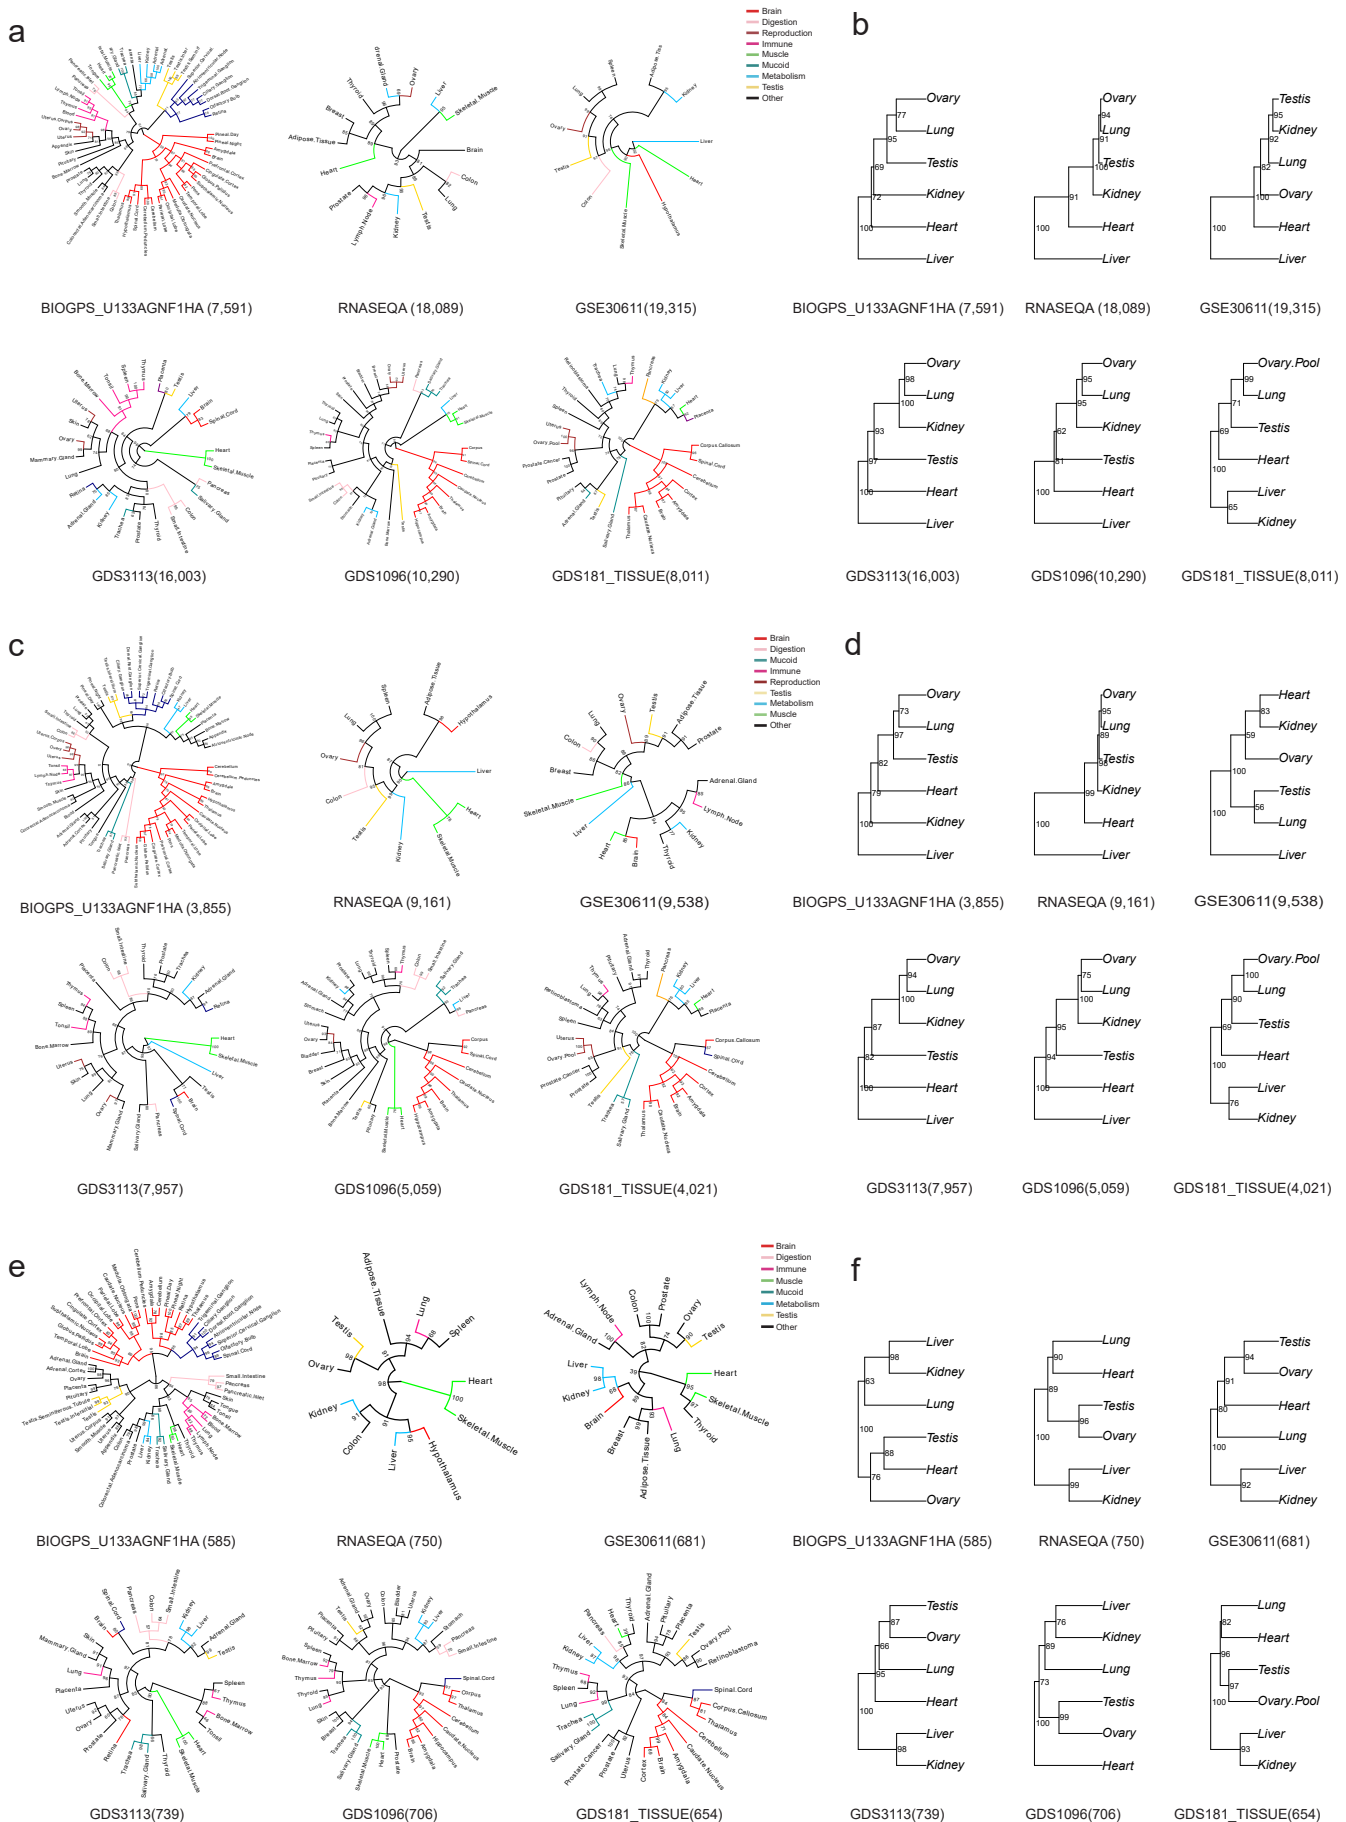

## Supplementary Figure S2. Organ clustering on six selective datasets.

The dataset name and the number of genes (in brackets) that used to make organ cluster were given under each cluster. (a), (c) and (e) used all organs/tissues in the datasets for clustering. (b), (d) and (f) used 6 common organs (heart, kidney, liver, lung, ovary and testis) for clustering. (a) and (b) were clustered upon genome wide gene co-expression. (c) and (d) were clustered upon feature gene co-expression after principle component analysis (PCA). (e) and (f) were clustered upon selective genes.

**Supplementary Table S1. Datasets involved in this study.**

| Dataset            | PubMed ID | Title                                                     | Type   |
|--------------------|-----------|-----------------------------------------------------------|--------|
| BIOGPS_U133AGNF1HA | 15075390  | Tissues of various types                                  | Tissue |
| GDS1096            | 15950434  | Normal tissues of various types                           | Tissue |
| GDS181_TISSUE      | 11904358  | Large-scale analysis of the human transcriptome (HG-U95A) | Tissue |
| GSE30611           | N.A.      | [E-MTAB-513] Illumina Human Body Map 2.0 Project          | Tissue |
| GDS3113            | 19014478  | Various normal tissues                                    | Tissue |
| RNASEQ             | 22345621  | RNA-Seq gene expression profiles of 15 tissues            | Tissue |
| GDS1835            | 15113400  | Various cell lines and Universal Reference RNA (II)       | Cell   |
| BIOGPS_U133AGNF1HB | 15075390  | Cells of various types                                    | Cell   |

**Supplementary Table S3. Identification of cell-specific genes and its comparison with organ-specific genes.**

| Cell Type               | Cell-specific Gene | Organ-specific Gene | Dataset            |
|-------------------------|--------------------|---------------------|--------------------|
| Brain Cell              | 65                 | 0                   | GDS1835            |
| Breast cell             | 53                 | 0                   | GDS1835            |
| Liver Cell              | 77                 | 24                  | GDS1835            |
| Testis Cell             | 22                 | 1                   | GDS1835            |
| Testis Germ Cell        | 77                 | 25                  | BIOGPS_U133AGNF1HB |
| Testis Leydig Cell      | 9                  | 4                   | BIOGPS_U133AGNF1HB |
| Testis Germ-Leydig Cell | 195                | 81                  | BIOGPS_U133AGNF1HB |
